# Supplementary material for: Glycogen Phosphorylase: A Drug Target of Amino Alcohols in Echinococcus granulosus, Predicted by a Computer-Aided Method
Source: Front Microbiol. 2020 Nov 23;11:557039. doi: 10.3389/fmicb.2020.557039 (PMC7719768; doi:10.3389/fmicb.2020.557039)
Supplement: Supplementary file 2 [file Table_2.XLSX]

## Sheet: sheet1
The validation of the quality of Homology modeling
Eg ID	PROCHECK		ERRAT		VERIFY 3D
	Original	Modified	Original	Modified	Original	Modified
Eg1	98.6	98.7	43.075	59.726	0.741	0.7421
Eg2	99.7	99.7	93.005	98.182	98.48%	0.9823	1
Eg3	99.2	99.6	72.388	82.836	59.42%	0.6196
Eg4	98.7	99.1	65.079	83.197	0.7283	0.7129
Eg5	99.3	100	78.762	86.145	0.8247	0.8333
Eg6	100	100	84.028	90.141	0.7297	0.7365
Eg7	100	100	74.138	83.737	0.7483	0.7416
Eg8	98.3	99.6	84.354	93.174	0.7566	0.727
Eg9	100	100	81.433	92.708	0.8302	0.8302	2
Eg10	98.9	98.9	40.399	58.533	0.463	0.5049
Eg11	99.3	97.3	69.014	82.41	0.424	0.6327
Eg12	99.4	97.3	47.914	63.693	0.6316	0.6019
Eg13	99.1	/	82.112	/	0.8083	/
Eg14	99.6	100	73.81	76.792	0.9371	0.7872
Eg15	98.5	98.8	64.161	86.022	0.7804	0.9205
Eg16	98.9	/	39.481	/	0.3095	/
Eg17	99.7	99.7	87.097	90.291	0.9043	0.9012	3
Eg18	99.6	99.6	80.071	87.455	96.19%	0.9239
Eg19	99.7	/	90.875	/	0.9368	/	4
Eg20	97.5	98.6	69.935	83.553	0.9248	0.9436
Eg21	99.6	100	69.98	90.707	0.8507	0.8166	5
Eg22	99.3	/	81.969	/	0.7209	/
Eg23	99	/	53.383	/	0.6445	/
Eg24	99.3	/	54.667	/	*	/
Eg25	99	/	79.899	/	55.59%	/
Eg26	/	/	/	/	/	/
Eg27	99.6	99.6	78.517	92.843	0.8821	0.884	6
Eg28	99.8	100	94.515	95.763	0.8891	0.8727	7
Eg29	98.8	98.9	51.181	70.861	0.7485	0.7195
Eg30	99.7	99.7	97.155	97.577	0.9423	0.953	8
Eg31	100	100	85.233	88.278	0.806	80.94%
Eg32	99.7	99.7	87.004	92.164	0.6135	0.6104	9
Eg33	99.7	99.7	85.042	89.045	0.9214	92.14%
Eg34	97.9	99.7	61.085	80.193	0.8295	0.825
Eg35	98.2	/	43.499	/	76.55%	/
Eg36	95.5	99.6	89.64	92.459	73.80%	91.43%	10
Eg37	99.4	99.7	35	64.286	0.705	0.6945
Eg38	98.8	99.2	26.078	51.65	0.6555	0.6678
Eg39	97.1	/	60.633	/	0.9036	/
Eg40	99.4	99.3	97.066	95.78	0.9163	0.9175	11
Eg41	99.4	99.4	80.061	88.037	0.8177	0.812
Eg42	99.4	99.7	81.88	89.646	88.83%	0.9102
Eg43	100	100	91.346	99.029	0.75	0.7009
Eg44	100	99.5	86.425	95.023	0.8603	84.72%	12
Eg45	100	/	45.714	/	0	/
Eg46	98.7	98.7	73.292	81.208	0.3626	0.345
Eg47	98	98.3	68.939	77.667	0.521	0.5136
Eg48	99.6	100	75.379	89.015	0.9596	1
Eg49	98.8	99.4	90.506	89.809	0.8771	0.8715	13
PROCHECK	>98
ERRAT	>80
VERIFY 3D	>80%	80% of the amino acids have scored >= 0.2 in the 3D/1D profile
* error occurred when processing

## Sheet: Sheet2
Docking binding energy of active amino alcohols docked into candidate proteins
Eg ID	JF16	Mefloquine
Eg2	-7.34	-6.75
Eg9	*	*
Eg17	-8.28	-7.41
Eg19	-9.69	-8.48
Eg21	-8.66	-8.3
Eg27	-8.79	-8.09
Eg28	-6.28	-5.9
Eg30	-6.96	-6.09
Eg32	-7.91	-8.04
Eg36	-6.72	-6.59
Eg40	-8.71	-8.65
Eg44	-8.22	-6.21
Eg49	-6.99	-6.48
*No contact with ligands

## Sheet: Sheet3
Docking poses of active amino alcohols docked into candidate proteins
Eg/PDB ID	JF16				MEF
	Charge	H-bond	π-π	Binding energy	Charge	H-bond	π-π	Binding energy
Eg19	1	2	2	-9.69	1	4	0	-8.48
Eg21	1	2	2	-8.66	3	6	0	-8.3
Eg27	1	3	3	-8.79	0	7	0	-8.09
Eg40	1	0	0	-8.71	2	3	0	-8.65

## Sheet: Sheet4
The ROC analysis of binding energy of candidate protein docking into different structures
Eg/PDB ID	ROC
	AUC	Sigma
Eg19	0.763	0.003
Eg21	0.618	0.167
Eg27	0.607	0.223
Eg40	NA	NA

## Sheet: Sheet5
The validation of homology modeling structure and docking parameters of EgGp1 and EgGp2
Proteins	Validation of homology modeling structure				Docking grid
	VERIFY 3D	ERRAT	PROCHECK	PROVE	location	Grid Point Spacing	Even Number of User-specified Grid Points
EgGp1	0.9181	94.1176	0.991	0.045	32.064, 78.889, 35.232	0.5	120, 120, 120
EgGp2	0.9019	95.5665	0.991	0.048	32.064, 78.889, 35.232	0.5	120, 120, 120

## Sheet: Sheet6
GO analysis of the proteins identified by Co-IP
Proteins	Biology Process	Molecular Function	Cellular Component
Glycogen phosphorylase	Carbohydrate metabolic process	Glycogen phosphorylase activity Pyridoxal phosphate binding Linear malto-oligosaccharide phosphorylase activity SHG alpha-glucan phosphorylase activity	-
Hydrocephalus inducing	-	-	-
Uncharacterized protein	-	-	-
Uncharacterized protein	-	-	-
Uncharacterized protein	-	-	-
These proteins were ones identified in both of anti-PYGB and anti-PYGM antibodies pulled down products, but not in anti-PYGL antibody pulled down products (as negative control)

## Sheet: Sheet7
Characteristics of antibodies
	Immunogen	Eg (identity)	Perdicted Molecular weight (KDa)
anti-PYGB (Abcam, UK, ab154969)	Recombinant fragment, corresponding to a region within amino acids 519-813 of Human GPBB (UniProt P11216). KKLLPLVSDEVFIRDVAKVKQENKLKFSAFLEKEYKVKINPSSMFDVHVKRIHEYKRQLLNCLHVVTLYNRIKRDPAKAFVPRTVMIGGKAAPGYHMAKLIIKLVTSIGDVVNHDPVVGDRLKVIFLENYRVSLAEKVIPAADLSQQISTAGTEASGTGNMKFMLNGALTIGTMDGANVEMAEEAGAENLFIFGLRVEDVEALDRKGYNAREYYDHLPELKQAVDQISSGFFSPKEPDCFKDIVNMLMHHDRFKVFADYEAYMQCQAQVDQLYRNPKEWTKKVIRNIACSGK…	0.63	96
anti-PYGL (Abcam, UK, ab198268)	Fusion protein corresponding to Human PYGL (C terminal). The identity of the protein fusion partner is GST (BC082229).	-	96
anti-PYGM (Abcam, UK, ab231963)	Recombinant fragment (His-tag) corresponding to Mouse PYGM aa 11-187. Expressed in E.coli. RKQISVRGLAGVENVSELKKNFNRHLHFTLVKDRNVATPRDYYFALAHTVRDHLVGRWIRTQQHYYEKDPKRIYYLSLEFYMGRTLQNTMVNLALENACDEATYQLGLDMEELEEIEEDAGLGNGGLGRLAACFLDSMATLGLAAYGYGI RYEFGIFNQKICGGWQMEEADDWLRYG	0.78	96
